# Supplementary material for: Characterization of Potential Molecular Markers in Lac Insect Kerria lacca (Kerr) Responsible for Lac Production
Source: MDPI journal article supplement (doi:10.3390/insects13060545), 2022-06-14
Supplement: s1 [file s1]

## Supplementary Information

### Characterization of Potential Molecular Markers in Lac Insect *Kerria lacca* (Kerr) Responsible for Lac Production

Nawaz Haider Bashir<sup>1</sup>, Weiwei Wang<sup>1</sup>, Xiaofei Ling<sup>1</sup>, Jinwen Zhang<sup>1</sup>, Qin Lu<sup>1</sup>, Rui He<sup>1</sup>, Hang Chen<sup>1,2\*</sup>

<sup>1</sup>Institute of Highland Forest Science, Chinese Academy of Forestry, Kunming, China

<sup>2</sup>The Key Laboratory of Cultivating and Utilization of Resources Insects, State Forestry Administration, Kunming, China

Corresponding author: Hang Chen ([stuchen6481@gmail.com](mailto:stuchen6481@gmail.com))

**Table S1: Summary of SNPs at different stages of *Kerria lacca***

| Sample (Stages) | Replication | A_G  | C_T  | Transition | A_C | A_T | C_G | G_T | Transversion | Total |
|-----------------|-------------|------|------|------------|-----|-----|-----|-----|--------------|-------|
| Larvae          | 1           | 1776 | 1664 | 3440       | 314 | 548 | 201 | 304 | 1367         | 4807  |
|                 | 2           | 1828 | 1811 | 3639       | 341 | 595 | 196 | 311 | 1443         | 5082  |
|                 | 3           | 1411 | 1336 | 2747       | 252 | 479 | 148 | 254 | 1133         | 3880  |
| Early Adult     | 1           | 2365 | 2330 | 4695       | 376 | 665 | 234 | 415 | 1690         | 6385  |
|                 | 2           | 2639 | 2499 | 5138       | 459 | 788 | 296 | 461 | 2004         | 7142  |
|                 | 3           | 2415 | 2248 | 4663       | 406 | 715 | 255 | 414 | 1790         | 6453  |
| Mid Adult       | 1           | 1582 | 1543 | 3125       | 256 | 449 | 153 | 264 | 1122         | 4247  |
|                 | 2           | 1495 | 1365 | 2860       | 245 | 417 | 129 | 238 | 1029         | 3889  |
|                 | 3           | 1575 | 1564 | 3139       | 271 | 469 | 164 | 277 | 1181         | 4320  |
| Late Adult      | 1           | 2697 | 2593 | 5290       | 275 | 564 | 201 | 296 | 1336         | 6626  |
|                 | 2           | 2769 | 2696 | 5465       | 305 | 580 | 201 | 329 | 1415         | 6880  |
|                 | 3           | 2881 | 2840 | 5721       | 298 | 566 | 216 | 326 | 1406         | 7127  |

**Table S2: SNP annotation at different stages of *Kerria lacca***

| Sample (Stages) | Replication | Upstream | Exon | Intron | Downstream | Intergenic |
|-----------------|-------------|----------|------|--------|------------|------------|
| Larvae          | 1           | 153      | 2137 | 702    | 559        | 1229       |
|                 | 2           | 157      | 2166 | 764    | 591        | 1377       |
|                 | 3           | 126      | 1608 | 640    | 458        | 1032       |
| Early Adult     | 1           | 207      | 2807 | 1040   | 701        | 1596       |
|                 | 2           | 255      | 3101 | 1172   | 757        | 1821       |
|                 | 3           | 214      | 2834 | 1058   | 701        | 1619       |
| Mid Adult       | 1           | 149      | 1845 | 679    | 502        | 1050       |
|                 | 2           | 125      | 1604 | 660    | 457        | 1025       |
|                 | 3           | 163      | 1670 | 775    | 480        | 1209       |
| Late Adult      | 1           | 232      | 3236 | 848    | 690        | 1588       |
|                 | 2           | 249      | 3115 | 1009   | 737        | 1739       |
|                 | 3           | 247      | 3400 | 1026   | 784        | 1647       |

**Table S3: InDel annotation at different stages of *Kerria lacca***

| Sample (Stages) | Replication | Upstream | Exon | Intron | Downstream | Intergenic |
|-----------------|-------------|----------|------|--------|------------|------------|
| Larvae          | 1           | 82       | 647  | 438    | 294        | 523        |
|                 | 2           | 87       | 694  | 437    | 342        | 554        |
|                 | 3           | 78       | 608  | 417    | 286        | 545        |
| Early Adult     | 1           | 78       | 590  | 393    | 284        | 476        |
|                 | 2           | 82       | 613  | 415    | 295        | 479        |
|                 | 3           | 71       | 610  | 402    | 292        | 466        |
| Mid Adult       | 1           | 89       | 579  | 400    | 284        | 429        |
|                 | 2           | 83       | 606  | 384    | 297        | 404        |
|                 | 3           | 79       | 605  | 435    | 304        | 511        |
| Late Adult      | 1           | 83       | 587  | 307    | 253        | 396        |
|                 | 2           | 97       | 577  | 371    | 289        | 461        |
|                 | 3           | 89       | 605  | 339    | 269        | 421        |

**Table S4: Genes associated with SNP variants**

| #Chr | Pos      | Ref | Alt | Qual    | Type       | Gene                                                                                      |
|------|----------|-----|-----|---------|------------|-------------------------------------------------------------------------------------------|
| chr5 | 23746789 | G   | C   | 254.75  | intergenic | gene_Kerria_yunnanensis0045760.1(dist=10185),gene_Kerria_yunnanensis0045770.1(dist=3388)  |
| chr5 | 23753533 | T   | C   | 648.91  | intronic   | gene_Kerria_yunnanensis0045770.1                                                          |
| chr5 | 23753554 | T   | C   | 36.1    | intronic   | gene_Kerria_yunnanensis0045770.1                                                          |
| chr5 | 23753563 | T   | C   | 332.26  | intronic   | gene_Kerria_yunnanensis0045770.1                                                          |
| chr5 | 23753570 | T   | C   | 705.71  | intronic   | gene_Kerria_yunnanensis0045770.1                                                          |
| chr5 | 23776791 | A   | G   | 148.93  | intergenic | gene_Kerria_yunnanensis0045770.1(dist=16841),gene_Kerria_yunnanensis0045780.1(dist=16240) |
| chr5 | 23776904 | T   | C   | 183.7   | intergenic | gene_Kerria_yunnanensis0045770.1(dist=16954),gene_Kerria_yunnanensis0045780.1(dist=16127) |
| chr5 | 23777261 | T   | C   | 481.21  | intergenic | gene_Kerria_yunnanensis0045770.1(dist=17311),gene_Kerria_yunnanensis0045780.1(dist=15770) |
| chr5 | 23778720 | G   | A   | 491.15  | intergenic | gene_Kerria_yunnanensis0045770.1(dist=18770),gene_Kerria_yunnanensis0045780.1(dist=14311) |
| chr5 | 23779082 | A   | G   | 10372.6 | intergenic | gene_Kerria_yunnanensis0045770.1(dist=19132),gene_Kerria_yunnanensis0045780.1(dist=13949) |
| chr5 | 23779084 | A   | G   | 1880.46 | intergenic | gene_Kerria_yunnanensis0045770.1(dist=19134),gene_Kerria_yunnanensis0045780.1(dist=13947) |
| chr4 | 20041782 | C   | T   | 15372.5 | intergenic | gene_Kerria_yunnanensis0054460.1(dist=21033),gene_Kerria_yunnanensis0054470.1(dist=32084) |
| chr3 | 13411115 | C   | T   | 392.04  | exonic     | gene_Kerria_yunnanensis0017940.1                                                          |
| chr3 | 13440194 | C   | T   | 107.99  | intergenic | gene_Kerria_yunnanensis0017940.1(dist=17205),gene_Kerria_yunnanensis0017950.1(dist=1720)  |
| chr1 | 7309099  | C   | T   | 77.83   | downstream | gene_Kerria_yunnanensis0002510.1(dist=825)                                                |
| chr3 | 18260212 | A   | G   | 14316   | exonic     | gene_Kerria_yunnanensis0019660.1                                                          |
| chr5 | 17276003 | A   | C   | 374.33  | intronic   | gene_Kerria_yunnanensis0043530.1                                                          |
| chr9 | 19187642 | G   | A   | 2818.56 | UTR5       | gene_Kerria_yunnanensis0063370.1(Kerria_yunnanensis0063370.1:c.-564G>A)                   |
| chr1 | 1539040  | G   | A   | 236.08  | splicing   | gene_Kerria_yunnanensis0000530.1(Kerria_yunnanensis0000530.1:exon7:c.943-1G>A)            |
| chr5 | 16368991 | A   | G   | 553.67  | UTR3       | gene_Kerria_yunnanensis0043050.1(Kerria_yunnanensis0043050.1:c.*250T>C)                   |
| chr5 | 16371880 | G   | A   | 236332  | exonic     | gene_Kerria_yunnanensis0043050.1                                                          |
| chr5 | 16373190 | A   | G   | 199.23  | upstream   | gene_Kerria_yunnanensis0043050.1(dist=602)                                                |
| chr5 | 16373193 | G   | A   | 198.77  | upstream   | gene_Kerria_yunnanensis0043050.1(dist=605)                                                |
| chr5 | 16373332 | G   | A   | 167.29  | upstream   | gene_Kerria_yunnanensis0043050.1(dist=744)                                                |
| chr5 | 16374269 | G   | A   | 407.49  | intergenic | gene_Kerria_yunnanensis0043050.1(dist=1681),gene_Kerria_yunnanensis0043060.1(dist=1780)   |
| chr5 | 16374308 | A   | G   | 297.39  | intergenic | gene_Kerria_yunnanensis0043050.1(dist=1720),gene_Kerria_yunnanensis0043060.1(dist=1741)   |
| chr1 | 5927857  | A   | T   | 344.22  | intergenic | gene_Kerria_yunnanensis0001970.1(dist=32338),gene_Kerria_yunnanensis0001980.1(dist=68938) |
| chr1 | 5927859  | G   | A   | 73.13   | intergenic | gene_Kerria_yunnanensis0001970.1(dist=32340),gene_Kerria_yunnanensis0001980.1(dist=68936) |
| chr1 | 10273522 | T   | C   | 4978.03 | UTR3       | gene_Kerria_yunnanensis0003520.1(Kerria_yunnanensis0003520.1:c.*329A>G)                   |
| chr1 | 10273523 | T   | C   | 507.65  | UTR3       | gene_Kerria_yunnanensis0003520.1(Kerria_yunnanensis0003520.1:c.*328A>G)                   |
| chr1 | 10273669 | T   | C   | 1205.5  | UTR3       | gene_Kerria_yunnanensis0003520.1(Kerria_yunnanensis0003520.1:c.*182A>G)                   |
| chr5 | 24577069 | T   | G   | 183.49  | intronic   | gene_Kerria_yunnanensis0046200.1                                                          |

|      |          |   |   |         |            |                                                                                           |
|------|----------|---|---|---------|------------|-------------------------------------------------------------------------------------------|
| chr2 | 11056916 | T | C | 17404.5 | exonic     | gene_Kerria_yunnanensis0071240.1                                                          |
| chr2 | 11058198 | G | A | 1392.52 | exonic     | gene_Kerria_yunnanensis0071240.1                                                          |
| chr2 | 11058207 | G | A | 7339.22 | exonic     | gene_Kerria_yunnanensis0071240.1                                                          |
| chr2 | 11058345 | T | A | 14350.1 | exonic     | gene_Kerria_yunnanensis0071240.1                                                          |
| chr2 | 11058801 | A | G | 9660.6  | exonic     | gene_Kerria_yunnanensis0071240.1                                                          |
| chr2 | 11059895 | G | A | 4597    | exonic     | gene_Kerria_yunnanensis0071240.1                                                          |
| chr8 | 7625995  | C | T | 77.99   | intronic   | gene_Kerria_yunnanensis0028390.1                                                          |
| chr8 | 7628480  | G | A | 1641.39 | exonic     | gene_Kerria_yunnanensis0028390.1                                                          |
| chr8 | 7634729  | C | T | 2668.15 | exonic     | gene_Kerria_yunnanensis0028390.1                                                          |
| chr8 | 7636072  | T | C | 4286.99 | exonic     | gene_Kerria_yunnanensis0028390.1                                                          |
| chr1 | 20949510 | G | A | 197.16  | intergenic | gene_Kerria_yunnanensis0008070.1(dist=3749),gene_Kerria_yunnanensis0008080.1(dist=1254)   |
| chr1 | 20951341 | G | A | 1610.83 | intronic   | gene_Kerria_yunnanensis0008080.1                                                          |
| chr3 | 24320204 | A | G | 3332.08 | intergenic | gene_Kerria_yunnanensis0022330.1(dist=2876),gene_Kerria_yunnanensis0022340.1(dist=2550)   |
| chr3 | 24322695 | A | G | 1342    | downstream | gene_Kerria_yunnanensis0022340.1(dist=59)                                                 |
| chr3 | 24325438 | A | G | 17609.4 | upstream   | gene_Kerria_yunnanensis0022340.1(dist=887)                                                |
| chr5 | 20356846 | T | G | 2369.09 | intronic   | gene_Kerria_yunnanensis0044650.1                                                          |
| chr5 | 20356847 | T | G | 74.44   | intronic   | gene_Kerria_yunnanensis0044650.1                                                          |
| chr8 | 9162156  | A | G | 406.36  | downstream | gene_Kerria_yunnanensis0028680.1,gene_Kerria_yunnanensis0028690.1(dist=181)               |
| chr8 | 9162745  | C | T | 477.88  | UTR3       | gene_Kerria_yunnanensis0028690.1(Kerria_yunnanensis0028690.1:c.*478G>A)                   |
| chr8 | 9165374  | T | C | 4464.76 | exonic     | gene_Kerria_yunnanensis0028690.1                                                          |
| chr8 | 9165430  | T | C | 3502.8  | exonic     | gene_Kerria_yunnanensis0028690.1                                                          |
| chr8 | 9168943  | G | A | 277.38  | upstream   | gene_Kerria_yunnanensis0028690.1,gene_Kerria_yunnanensis0028700.1(dist=619)               |
| chr5 | 16849914 | A | G | 7941.77 | UTR3       | gene_Kerria_yunnanensis0043180.1(Kerria_yunnanensis0043180.1:c.*389T>C)                   |
| chr5 | 24317578 | A | G | 739.1   | exonic     | gene_Kerria_yunnanensis0046050.1                                                          |
| chr3 | 13333518 | C | T | 1842.33 | intergenic | gene_Kerria_yunnanensis0017920.1(dist=44714),gene_Kerria_yunnanensis0017930.1(dist=63540) |
| chr3 | 13357300 | C | A | 756.6   | intergenic | gene_Kerria_yunnanensis0017920.1(dist=68496),gene_Kerria_yunnanensis0017930.1(dist=39758) |
| chr3 | 13357447 | C | T | 1197.81 | intergenic | gene_Kerria_yunnanensis0017920.1(dist=68643),gene_Kerria_yunnanensis0017930.1(dist=39611) |
| chr1 | 1250642  | A | C | 6274.36 | downstream | gene_Kerria_yunnanensis0000420.1(dist=417)                                                |
| chr1 | 1250643  | A | C | 910.44  | downstream | gene_Kerria_yunnanensis0000420.1(dist=416)                                                |
| chr3 | 18310059 | C | T | 1341.23 | exonic     | gene_Kerria_yunnanensis0019680.1                                                          |
| chr3 | 18313603 | T | C | 1447.19 | UTR3       | gene_Kerria_yunnanensis0019680.1(Kerria_yunnanensis0019680.1:c.*329T>C)                   |
| chr3 | 18317631 | C | A | 1617.57 | intergenic | gene_Kerria_yunnanensis0019680.1(dist=3275),gene_Kerria_yunnanensis0019690.1(dist=5280)   |
| chr3 | 18317768 | A | G | 431.92  | intergenic | gene_Kerria_yunnanensis0019680.1(dist=3412),gene_Kerria_yunnanensis0019690.1(dist=5143)   |
| chr3 | 18317795 | T | G | 295.96  | intergenic | gene_Kerria_yunnanensis0019680.1(dist=3439),gene_Kerria_yunnanensis0019690.1(dist=5116)   |

|      |              |   |   |             |                |                                                                                         |
|------|--------------|---|---|-------------|----------------|-----------------------------------------------------------------------------------------|
| chr3 | 183178<br>85 | A | G | 662.1<br>6  | intergeni<br>c | gene_Kerria_yunnanensis0019680.1(dist=3529),gene_Kerria_yunnanensis0019690.1(dist=5026) |
| chr3 | 183181<br>31 | A | T | 107.3<br>1  | intergeni<br>c | gene_Kerria_yunnanensis0019680.1(dist=3775),gene_Kerria_yunnanensis0019690.1(dist=4780) |
| chr3 | 183183<br>96 | C | T | 1609.<br>7  | intergeni<br>c | gene_Kerria_yunnanensis0019680.1(dist=4040),gene_Kerria_yunnanensis0019690.1(dist=4515) |
| chr3 | 183185<br>55 | G | A | 1006.<br>01 | intergeni<br>c | gene_Kerria_yunnanensis0019680.1(dist=4199),gene_Kerria_yunnanensis0019690.1(dist=4356) |
| chr3 | 183194<br>18 | C | A | 810.4<br>2  | intergeni<br>c | gene_Kerria_yunnanensis0019680.1(dist=5062),gene_Kerria_yunnanensis0019690.1(dist=3493) |
| chr3 | 183194<br>34 | T | A | 826.5<br>8  | intergeni<br>c | gene_Kerria_yunnanensis0019680.1(dist=5078),gene_Kerria_yunnanensis0019690.1(dist=3477) |
| chr3 | 183196<br>83 | T | C | 3158.<br>17 | intergeni<br>c | gene_Kerria_yunnanensis0019680.1(dist=5327),gene_Kerria_yunnanensis0019690.1(dist=3228) |
| chr3 | 183205<br>83 | T | A | 369.4<br>1  | intergeni<br>c | gene_Kerria_yunnanensis0019680.1(dist=6227),gene_Kerria_yunnanensis0019690.1(dist=2328) |

**Table S5: Genes associated with InDel variants**

| #Chr | Pos      | Ref | Alt    | Qual    | Length | Type       | Gene                                                                                      |
|------|----------|-----|--------|---------|--------|------------|-------------------------------------------------------------------------------------------|
| chr5 | 23775786 | T   | TA     | 92.14   | 1      | intergenic | gene_Kerria_yunnanensis0045770.1(dist=15836),gene_Kerria_yunnanensis0045780.1(dist=17245) |
| chr5 | 23752224 | A   | AT     | 86.62   | 1      | intronic   | gene_Kerria_yunnanensis0045770.1                                                          |
| chr1 | 7310856  | T   | TA     | 128.52  | 1      | intronic   | gene_Kerria_yunnanensis0002510.1                                                          |
| chr4 | 20028498 | A   | AT     | 193.43  | 1      | intergenic | gene_Kerria_yunnanensis0054460.1(dist=7749),gene_Kerria_yunnanensis0054470.1(dist=45368)  |
| chr4 | 20044728 | C   | CA     | 138.26  | 1      | intergenic | gene_Kerria_yunnanensis0054460.1(dist=23979),gene_Kerria_yunnanensis0054470.1(dist=29138) |
| chr4 | 20044908 | G   | GA     | 264.51  | 1      | intergenic | gene_Kerria_yunnanensis0054460.1(dist=24159),gene_Kerria_yunnanensis0054470.1(dist=28958) |
| chr4 | 20020665 | G   | GA     | 71.2    | 1      | UTR3       | gene_Kerria_yunnanensis0054460.1(Kerria_yunnanensis0054460.1:c.*149_*150insA)             |
| chr4 | 20020763 | A   | AT     | 153.94  | 1      | downstream | gene_Kerria_yunnanensis0054460.1(dist=14)                                                 |
| chr5 | 17276000 | A   | AC     | 60.06   | 1      | intronic   | gene_Kerria_yunnanensis0043530.1                                                          |
| chr5 | 17291939 | C   | CAAGAA | 569.25  | 5      | intergenic | gene_Kerria_yunnanensis0043530.1(dist=11976),gene_Kerria_yunnanensis0043540.1(dist=16844) |
| chr5 | 17291943 | A   | AAAAAG | 3299.97 | 4      | intergenic | gene_Kerria_yunnanensis0043530.1(dist=11980),gene_Kerria_yunnanensis0043540.1(dist=16840) |
| chr5 | 17291945 | A   | AAG    | 134.38  | 2      | intergenic | gene_Kerria_yunnanensis0043530.1(dist=11982),gene_Kerria_yunnanensis0043540.1(dist=16838) |
| chr1 | 1536982  | C   | CT     | 103.6   | 1      | intronic   | gene_Kerria_yunnanensis0000530.1                                                          |
| chr3 | 4660084  | C   | CA     | 280.57  | 1      | intergenic | gene_Kerria_yunnanensis0013800.1(dist=1296),gene_Kerria_yunnanensis0013810.1(dist=1036)   |
| chr1 | 10273515 | T   | TC     | 8261.39 | 1      | UTR3       | gene_Kerria_yunnanensis0003520.1(Kerria_yunnanensis0003520.1:c.*335_*336insG)             |
| chr1 | 6543338  | C   | CT     | 86.56   | 1      | intronic   | gene_Kerria_yunnanensis0002170.1                                                          |
| chr1 | 6543345  | G   | GT     | 333.07  | 1      | intronic   | gene_Kerria_yunnanensis0002170.1                                                          |
| chr1 | 6543576  | C   | CA     | 168.15  | 1      | intronic   | gene_Kerria_yunnanensis0002170.1                                                          |
| chr5 | 24588931 | T   | TA     | 135.2   | 1      | intronic   | gene_Kerria_yunnanensis0046210.1                                                          |
| chr1 | 20946897 | T   | TA     | 134.54  | 1      | intergenic | gene_Kerria_yunnanensis0008070.1(dist=1136),gene_Kerria_yunnanensis0008080.1(dist=3867)   |
| chr1 | 20949051 | G   | GA     | 456.98  | 1      | intergenic | gene_Kerria_yunnanensis0008070.1(dist=3290),gene_Kerria_yunnanensis0008080.1(dist=1713)   |
| chr1 | 20949090 | A   | AT     | 126.16  | 1      | intergenic | gene_Kerria_yunnanensis0008070.1(dist=3329),gene_Kerria_yunnanensis0008080.1(dist=1674)   |
| chr3 | 24343624 | C   | CA     | 158.86  | 1      | intergenic | gene_Kerria_yunnanensis0022350.1(dist=5961),gene_Kerria_yunnanensis0022360.1(dist=20756)  |
| chr5 | 20356845 | T   | TG     | 381.92  | 1      | intronic   | gene_Kerria_yunnanensis0044650.1                                                          |
| chr5 | 20360950 | A   | AT     | 223.43  | 1      | downstream | gene_Kerria_yunnanensis0044650.1(dist=806)                                                |
| chr5 | 16858160 | T   | TTTC   | 3104.74 | 3      | intronic   | gene_Kerria_yunnanensis0043180.1                                                          |
| chr5 | 16858161 | T   | TTC    | 622.25  | 2      | intronic   | gene_Kerria_yunnanensis0043180.1                                                          |
| chr1 | 33062380 | T   | TA     | 100.02  | 1      | intergenic | gene_Kerria_yunnanensis0012320.1(dist=5417),gene_Kerria_yunnanensis0012330.1(dist=4783)   |
| chr1 | 1249889  | G   | GA     | 298.44  | 1      | intergenic | gene_Kerria_yunnanensis0000410.1(dist=51190),gene_Kerria_yunnanensis0000420.1(dist=1170)  |
| chr1 | 1250008  | G   | GA     | 125.14  | 1      | intergenic | gene_Kerria_yunnanensis0000410.1(dist=51309),gene_Kerria_yunnanensis0000420.1(dist=1051)  |
| chr1 | 1259354  | A   | AT     | 169.45  | 1      | intronic   | gene_Kerria_yunnanensis0000420.1                                                          |
| chr1 | 1250464  | A   | AAAAAG | 203.24  | 5      | downstream | gene_Kerria_yunnanensis0000420.1(dist=595)                                                |

|       |          |   |           |         |   |            |                                                                             |
|-------|----------|---|-----------|---------|---|------------|-----------------------------------------------------------------------------|
| chr 1 | 1250465  | A | AAAA<br>G | 1464.37 | 4 | downstream | gene_Kerria_yunnanensis0000420.1(dist=594)                                  |
| chr 1 | 1250466  | A | AAAG      | 2254.2  | 3 | downstream | gene_Kerria_yunnanensis0000420.1(dist=593)                                  |
| chr 1 | 1250467  | A | AAG       | 197.28  | 2 | downstream | gene_Kerria_yunnanensis0000420.1(dist=592)                                  |
| chr 1 | 1250641  | A | AC        | 779.13  | 1 | downstream | gene_Kerria_yunnanensis0000420.1(dist=418)                                  |
| chr 1 | 1251006  | T | TA        | 2190.62 | 1 | downstream | gene_Kerria_yunnanensis0000420.1(dist=53)                                   |
| chr 4 | 22776443 | C | CT        | 7794.8  | 1 | intronic   | gene_Kerria_yunnanensis0055150.1                                            |
| chr 4 | 22776684 | G | GT        | 200.81  | 1 | intronic   | gene_Kerria_yunnanensis0055150.1                                            |
| chr 4 | 16676489 | A | AT        | 5595.15 | 1 | downstream | gene_Kerria_yunnanensis0053140.1.gene_Kerria_yunnanensis0053150.1(dist=421) |
